# Supplementary material for: Is Vitamin D Deficiency the Cause or the Effect of Systemic Lupus Erythematosus: Evidence from Bidirectional Mendelian Randomization Analysis
Source: J Immunol Res. 2022 Sep 21;2022:8689777. doi: 10.1155/2022/8689777 (PMC9519279; doi:10.1155/2022/8689777)
Supplement: Supplementary Materials — Supplementary table 1: harmonized dataset of univariate Mendelian randomization for the effect of SLE on vitamin D with model 1. Supplementary table 2: harmonized dataset of univariate Mendelian randomization for the effect of SLE on vitamin D with model 2. Supplementary table 3: harmonized dataset of univariate Mendelian randomization for the effect of SLE on 25-hydroxyvitamin D with model 1. Supplementary table 4: harmonized dataset of univariate Mendelian randomization for the effect of SLE on 25-hydroxyvitamin D with model 2. Supplementary table 5: harmonized dataset of univariate Mendelian randomization for the effect of vitamin D on SLE with model 1. Supplementary table 6: harmonized dataset of univariate Mendelian randomization for the effect of vitamin D on SLE with model 2. Supplementary table 7: harmonized dataset of univariate Mendelian randomization for the effect of 25-hydroxyvitamin D on SLE with model 1. Supplementary table 8: harmonized dataset of univariate Mendelian randomization for the effect of 25-hydroxyvitamin D on SLE with model 2. Supplementary table 9: MR-PRESSO estimates between vitamin D and systemic lupus erythematosus. Supplementary figure 1: IVW radial for the effect of SLE on vitamin D with model 1. Supplementary figure 2: IVW radial for the effect of SLE on vitamin D with model 2. Supplementary figure 3: diagnostic plots generated by MR-RAPS of SLE on vitamin D with model 1. Supplementary figure 4: diagnostic plots generated by MR-RAPS of SLE on vitamin D with model 2. Supplementary figure 5: IVW radial for the effect of SLE on 25-hydroxyvitamin D levels with model 1. Supplementary figure 6: IVW radial for the effect of SLE on 25-hydroxyvitamin D levels with model 2. Supplementary figure 7: IVW radial for the effect of vitamin D on SLE with model 1. Supplementary figure 8: IVW radial for the effect of vitamin D on SLE with model 2. Supplementary figure 9: diagnostic plots generated by MR-RAPS of vitamin D on SLE with model 1. Supplem [file 8689777.f1.zip]

Archive with 15 entries (15 files):
- SF1 (1).png
- SF10.png
- SF11.png
- SF12.png
- SF13.png
- SF14.png
- SF2.png
- SF3.png
- SF4.png
- SF5.png
- SF6.png
- SF7.png
- SF8.png
- SF9.png
- Supplymentary tables.docx
